# Supplementary material
Source: PubMed Central journal article supplement (PMC7731903)

**Supplementary Figure S2.** Immunohistochemical staining of Bcl2, cMyc, Ki67, and CD3 in DLBCL subtype representative tumor samples (same as Supplementary Figure S1). Note that AD091967 is positive for both Bcl2 and cMyc. Cases AB189717, AD550620, and AE575816 show high proliferation rates (80%, 80%, 60%) Scale bars represent 50  $\mu$ m.

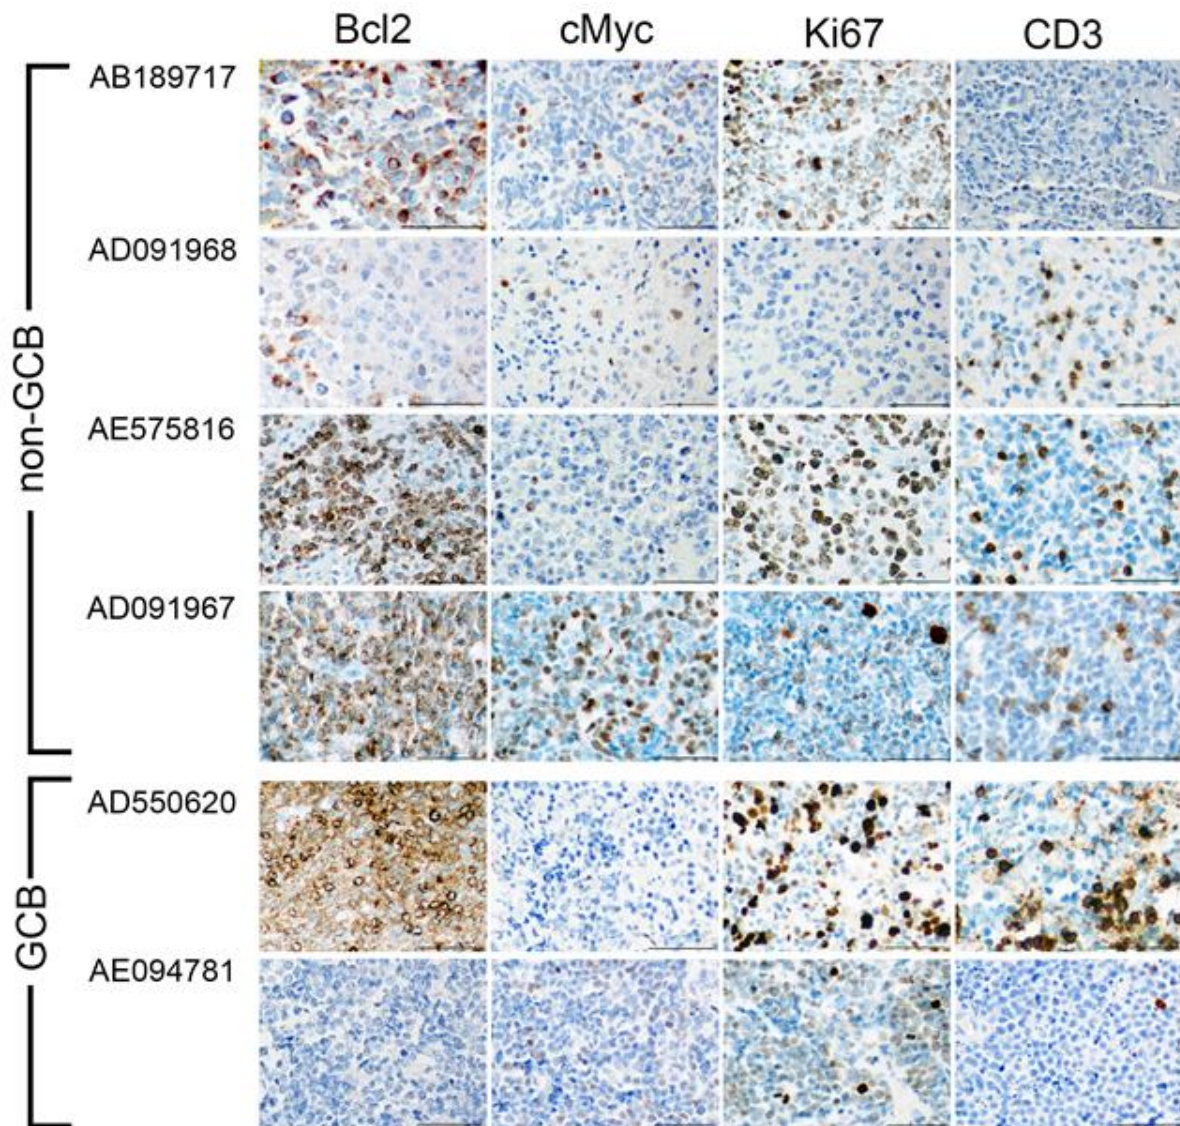

Supplement: NIHMS1622553-supplement-SM2.pdf [file NIHMS1622553-supplement-SM2.pdf]
